# Supplementary material for: The ruthenium complex assists in nuclear targeting and selective killing of tumor cells
Source: Royal Society of Chemistry journal article supplement (doi:10.1039/d3nr02707d), 2023-01-01
Supplement: d3nr02707d1.pdf [file d3nr02707d1.pdf]

# 1 Supporting information for The ruthenium complex assists in 2 nuclear targeting and selective killing of tumor cells

3

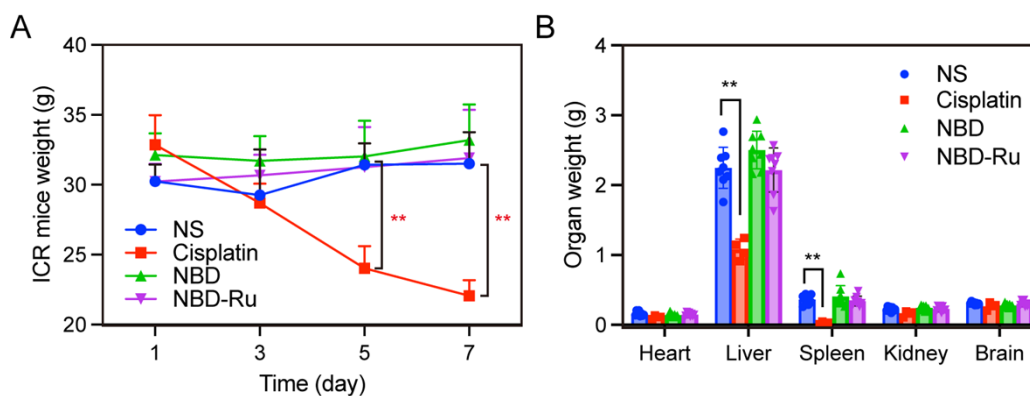

4

5 Figure S1. *In vivo* safety evaluation of S180 mouse model. (A) The body weight of ICR mice after  
6 treatment for 7 days. (B) Organ weight of ICR mice after treatment with different compounds.

7

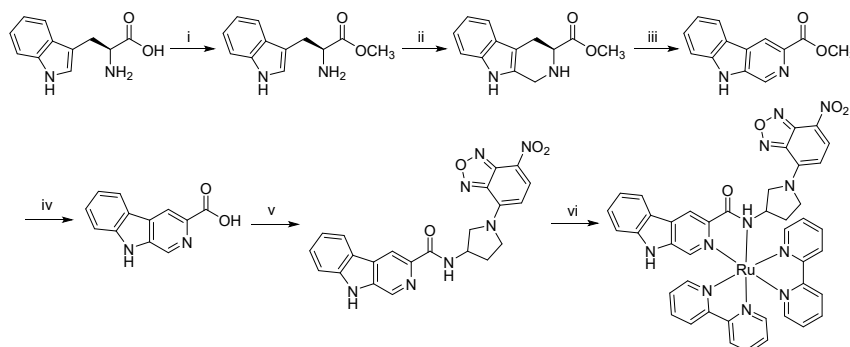

8

9 Scheme 1. Synthesis route of **NBD-Ru**. (i) SOCl<sub>2</sub>, MeOH; (ii) MeOH, H<sub>2</sub>SO<sub>4</sub>; (iii) KMnO<sub>4</sub>, acetone/H<sub>2</sub>O;  
10 (iv) 2N NaOH; (v) 1-(7-nitro-1,3-dihydrobenzo[c][1,2,5]oxadiazol-4-yl)pyrrolidine-3-amine, DCC,  
11 HOBt, DMF; (vi) Ru(bpy)<sub>2</sub>Cl<sub>2</sub>·H<sub>2</sub>O, DMF/H<sub>2</sub>O.

## 12 1. Synthesis of NBD

### 13 1.1 Synthesis of L-Trp-OCH<sub>3</sub>

14 6 mL of SOCl<sub>2</sub> is added dropwise to 80 mL of anhydrous methanol at 0°C. And the reaction mixture is  
15 stirred at 0°C for 0.5 h, and then L-Trp 4.08 g (20 mmol) is added. The reaction mixture is stirred at  
16 room temperature for another 24 h, and TLC is used to monitor the reaction. The reaction mixture is  
17 concentrated under a vacuum. The resulting crude product is dissolved in 8 ml of methanol and then  
18 dried at reduced pressure three times. The residue is again suspended in ether and concentrated under a

1 vacuum three times. The pure product was obtained by column chromatography. The colorless powder  
2 weighed 4.18 g, and the yield was 95.4%.

### 3 1.2 Synthesis of methyl (S)-2,3,4,9-tetrahydro-1H-pyrido[3,4-b]indole-3-carboxylate

4 The method is similar with that in 1.1, and the difference is that “10.00 g (49 mmol) L-Trp” is replaced  
5 with “10.73 g (49 mmol) Trp-OCH<sub>3</sub>”. <sup>1</sup>H NMR (300 MHz, *d*<sub>6</sub>-DMSO), δ = 11.20 ppm (s, 1H), 10.15  
6 ppm (s, 1H), 7.48 ppm (d, 1H, *J* = 7.8 Hz), 7.38 ppm (d, 1H, *J* = 8.1 Hz), 7.12 ppm (t, 1H, *J* = 7.5 Hz),  
7 7.02 ppm (t, 1H, *J* = 7.5 Hz), 4.62 ppm (dd, 1H, *J*<sub>1</sub> = 5.1 Hz, *J*<sub>2</sub> = 9.9 Hz), 4.39 ppm (s, 2H), 3.83 ppm (s,  
8 3H), 3.30 ppm (dd, 1H, *J*<sub>1</sub> = 14.7 Hz, *J*<sub>2</sub> = 4.5 Hz), 3.07 ppm (dd, 1H, *J*<sub>1</sub> = 15.9 Hz, *J*<sub>2</sub> = 10.2 Hz).

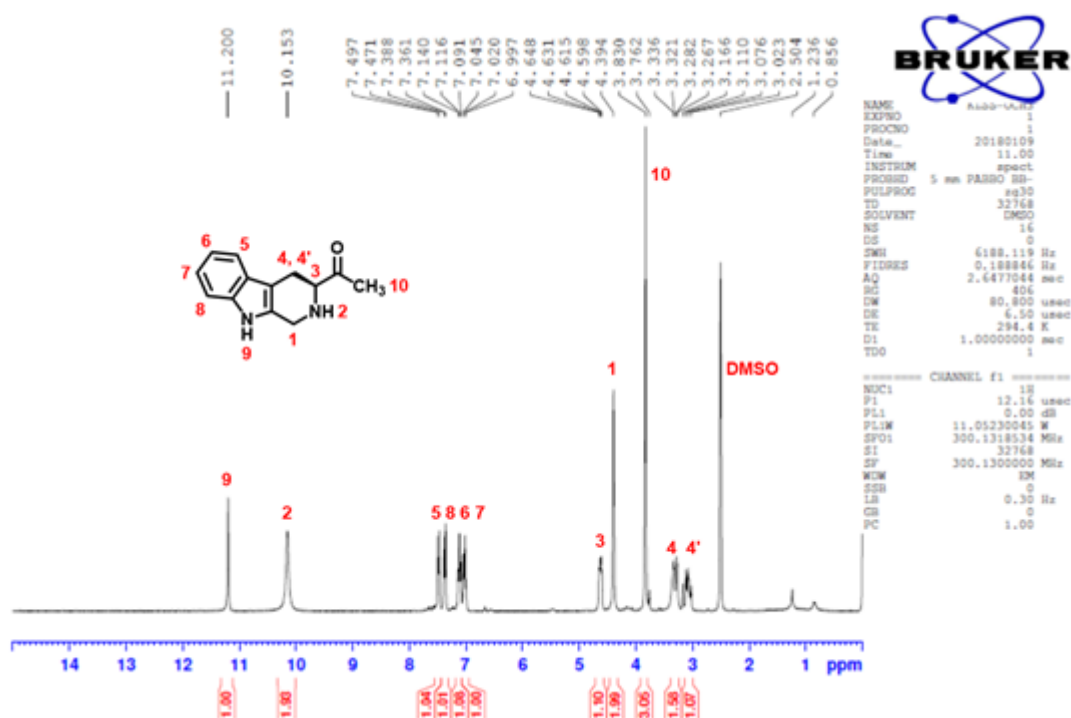

10 Figure S2. The <sup>1</sup>H NMR of methyl 2,3,4,9-tetrahydro-1H-pyrido[3,4-b]indole-3-carboxylate.

### 11 1.3 Synthesis of methyl 9H-pyrido[3,4-b]indole-3-carboxylate

12 Methyl 2,3,4,9-tetrahydro-1H-pyrido[3,4-b]indole-3-carboxylate 460 mg (0.2 mmol) was dissolved in  
13 15 mL of acetone to get solution A. And solution B is made by dissolving KMnO<sub>4</sub> 474 mg (0.4 mmol)  
14 in 10 mL of water. Then transfer B to A drop by drop at 0 °C. The reaction mixture is stirred at room  
15 temperature overnight, and TLC is used to monitor the reaction. Add ethanol to terminate the reaction.  
16 The resulting crude product is filtered to remove MnO<sub>2</sub> and the solvent is removed in a vacuum from the  
17 filtrate. The pure product was obtained by column chromatography. The pale-yellow powder weighed  
18 174 mg, and the yield was 38.5%. ESI-MS (*m/e*): 227.13 [M + H]<sup>+</sup>. <sup>1</sup>H NMR (300 MHz, *d*<sub>6</sub>-DMSO),  
19 δ = 12.09 ppm (s, 1H), 8.97 ppm (s, 1H), 8.94 ppm (s, 1H), 8.41 ppm (d, 1H, *J* = 7.8 Hz), 7.68 ppm (d,

1 1H,  $J = 8.1$  Hz), 7.61 ppm (t, 1H,  $J = 7.5$  Hz), 7.32 ppm (t, 1H,  $J = 7.2$  Hz), 3.91 ppm(s, 3H).

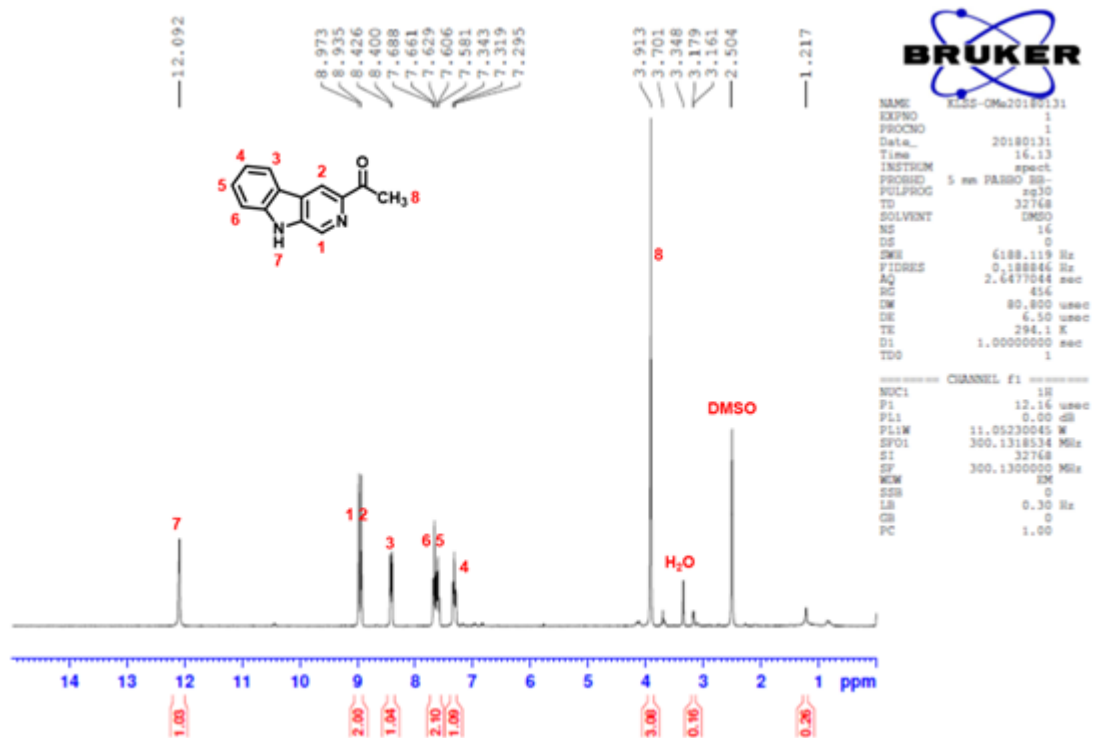

2

3 Figure S3. The <sup>1</sup>H NMR of methyl 9H-pyrido[3,4-b]indole-3-carboxylate.

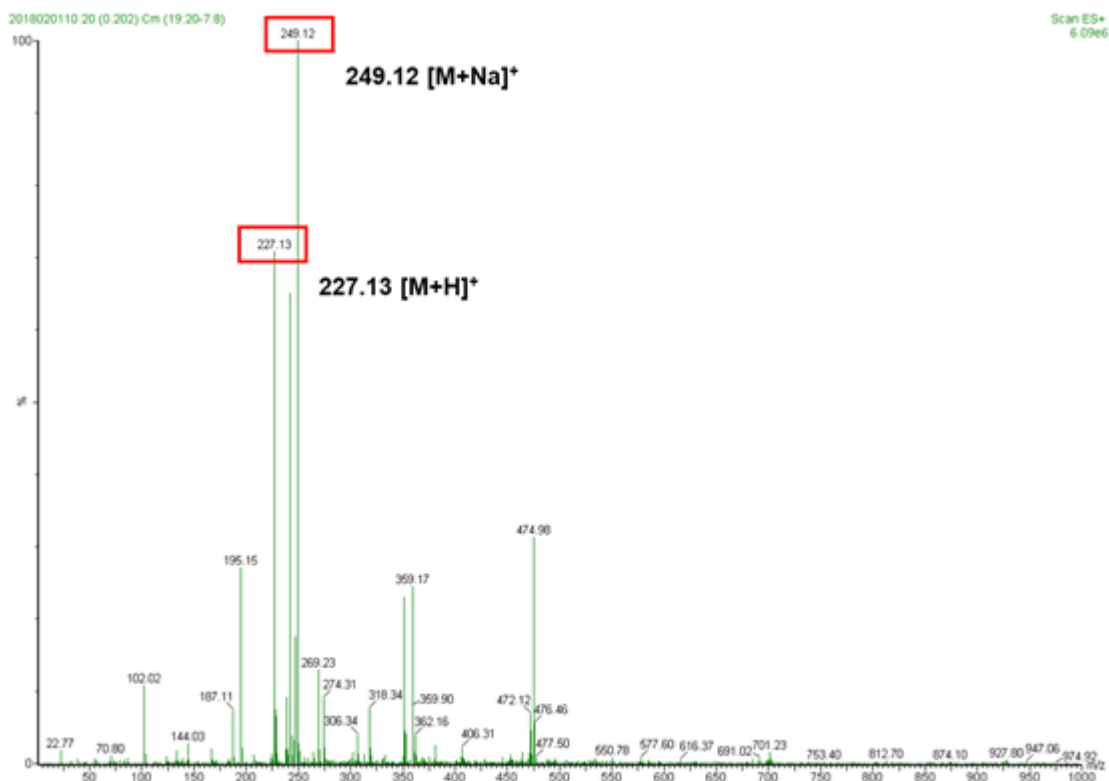

4

5 Figure S4. The MS spectrum of methyl 9H-pyrido[3,4-b]indole-3-carboxylate.

6 1.4 Synthesis of 9H-pyrido[3,4-b]indole-3-carboxylic acid

1 Dissolve methyl 9H-pyrido[3,4-b]indole-3-carboxylate 100 mg (0.044 mmol) in 10 mL of methanol at  
 2 0°C. Adjusting the mixture to pH 12 by adding 2N NaOH. The reaction mixture is stirred at 0°C for 6 h.  
 3 When the TLC plate indicates a complete disappearance of the raw material (O-KLSS-OMe), quench the  
 4 reaction by adjusting the reaction to pH 7 with an aqueous KHSO<sub>4</sub> solution. After filtration, the filtrate  
 5 was concentrated under reduced pressure. After a small amount of water is added to the syrup, a brick-  
 6 red solid is washed out. The title compound was obtained after filtering and drying. The red brick powder  
 7 weighed 36.6 mg. The filtrate was adjusted to pH 2 by saturated aqueous KHSO<sub>4</sub> solution and extracted  
 8 with ethyl acetate(20 mL\*3). The organic phase was washed with saturated aqueous NaCl solution  
 9 (15mL\*3). The organic layer was dried over anhydrous Na<sub>2</sub>SO<sub>4</sub> for 2 h. The title compound was obtained  
 10 after filtration and evaporation under reduced pressure. The colorless powder weighed 16.6 mg. Calculate  
 11 the gross yield as 56.7%. ESI-MS (m/e): 212.94 [M + H]<sup>+</sup>. <sup>1</sup>H NMR ( 300 MHz, d<sub>6</sub>-DMSO ) , δ = 12.20  
 12 ppm (s, 1H), 9.00 ppm (s, 2H), 8.45 ppm (d, 1H, *J* = 7.8 Hz), 7.71 ppm (d, 1H, *J* = 8.1 Hz), 7.64 ppm (t,  
 13 1H, *J* = 7.5 Hz), 7.35 ppm (t, 1H, *J* = 7.2 Hz).

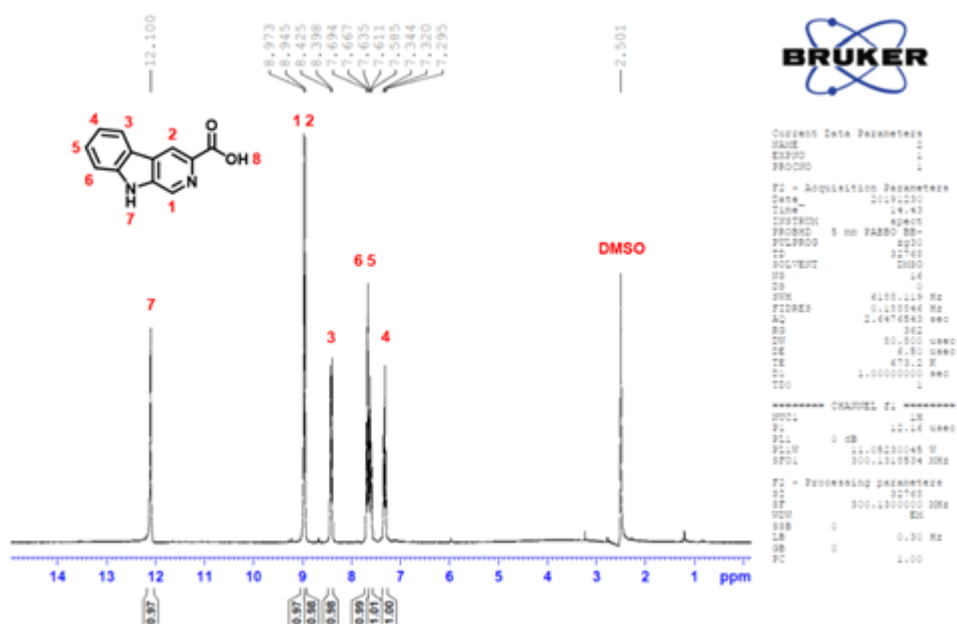

14

15 Figure S5. The <sup>1</sup>H NMR of 9H-pyrido[3,4-b]indole-3-carboxylic acid.

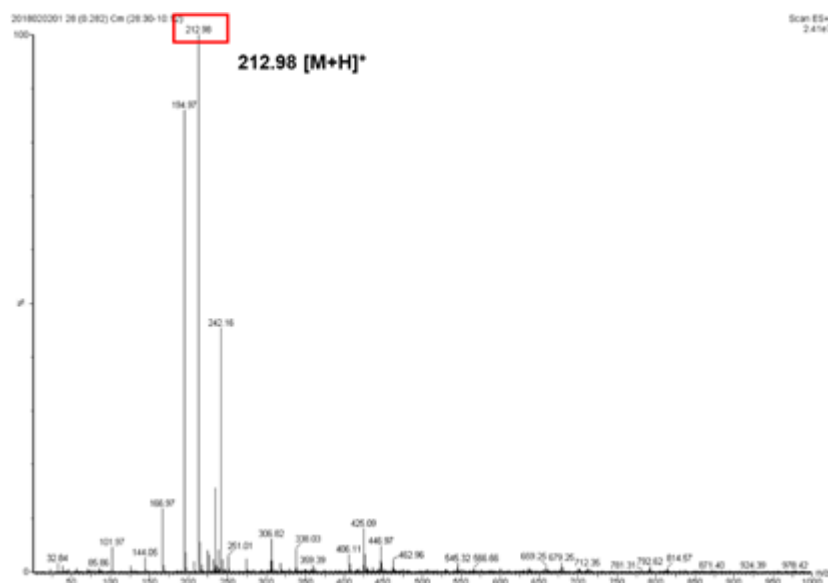

1  
2 Figure S6. The MS spectrum of **9H-pyrido[3,4-b]indole-3-carboxylic acid**.

### 3 1.5 Synthesis of **NBD**

4 Dissolve 9H-pyrido[3,4-b]indole-3-carboxylic acid 2.12 g (10 mmol), HOBt 1.62 g (12 mmol), and DCC  
5 2.68 g (13 mmol) in 50 mL of anhydrous DMF at 0 °C to get solution A which is stirred for 30 min. And  
6 solution B is made by dissolving 1-(7-nitro-1,3-dihydrobenzo[c][1,2,5]oxadiazol-4-yl)pyrrolidine-3-  
7 amine 2.74 g (11 mmol) in 10 mL of anhydrous DMF and then adjusting the mixture to pH 7 by adding  
8 NMM. Solution A and B are mixed to form solution C, which is stirred vigorously, and the pH of the  
9 reaction mixture is kept at 8-9 by adding NMM. The reaction mixture is stirred at room temperature for  
10 6 h, and TLC is used to monitor the reaction. Workup: the resulting crude product is filtered to remove  
11 the side product dicyclohexylurea (DCU), and the solvent is removed in a vacuum from the filtrate. The  
12 yielded syrup is then dissolved in 150 mL of ethyl acetate to get a solution which is then transferred into  
13 a 250 ml separatory funnel and washed successively by saturated aqueous NaHCO<sub>3</sub> (30 mL\*3), saturated  
14 aqueous NaCl, 5% aqueous KHSO<sub>4</sub> (30 mL\*3), 5% aqueous NaHCO<sub>3</sub> (30 mL\*3) and saturated aqueous  
15 NaCl (30 mL\*3). The separated ethyl acetate layer is dried by anhydrous Na<sub>2</sub>SO<sub>4</sub>. After filtration, the  
16 filtrate is concentrated at reduced pressure. The pure product was obtained by column chromatography.  
17 The orange powder weighed 2.08 g, and the yield was 46.8 %. ESI-MS (m/e): 444.3[M+H]<sup>+</sup>. <sup>1</sup>H NMR  
18 (300 MHz, *d*<sub>6</sub>-DMSO), δ (ppm) = 11.93 ppm (s, 1H) , 9.15 ppm (d, 1H, *J* = 7.17 Hz), 8.87 ppm (s,  
19 2H), 8.50 ppm (d, 1H, *J* = 8.61 ppm) , 8.40 ppm (d, 1H, *J* = 7.80 Hz), 7.62 ppm (m, 2H, *J* = 7.31 Hz),  
20 7.30 ppm (t, 1H, *J* = 7.04 Hz), 6.33 ppm (d, 1H, *J* = 8.91 Hz) , 4.88 ppm (s,1H) , 4.42 ppm (m, 2H) , 3.95  
21 ppm (m, 1H), 2.40 ppm (m, 2H); <sup>13</sup>C-NMR (75 MHz, DMSO-*d*<sub>6</sub>): δ (ppm) = 155.70, 145.44, 145.11,

- 1 144.85, 141.52, 149.91, 137.70, 136.81, 132.63, 129.13, 128.65, 122.70, 121.43, 120.50, 120.00, 114.72,
- 2 112.73, 102.54, 58.08, 55.91, 49.87, 48.62, 47.98, 33.80, 31.73, 30.30, 24.91; IR:  $\nu_{\text{NH}}$ : 3322  $\text{cm}^{-1}$ ,  $\nu_{\text{NH}}$ :
- 3 3300–3000  $\text{cm}^{-1}$ ,  $\nu_{\text{CH}_2}$ : 2928  $\text{cm}^{-1}$ , 2849  $\text{cm}^{-1}$ ,  $\nu_{\text{O=C-NH}}$ : 1558  $\text{cm}^{-1}$ ,  $\nu_{\text{C=C}}$ : 1615  $\text{cm}^{-1}$ , 1496  $\text{cm}^{-1}$ , 1459  $\text{cm}^{-1}$ ,
- 4  $\nu_{\text{C-OH}}$ : 1089  $\text{cm}^{-1}$ ,  $\delta_{\text{C-H}}$ : 732  $\text{cm}^{-1}$ ; M.p: 216.5 - 217.4  $^{\circ}\text{C}$ .

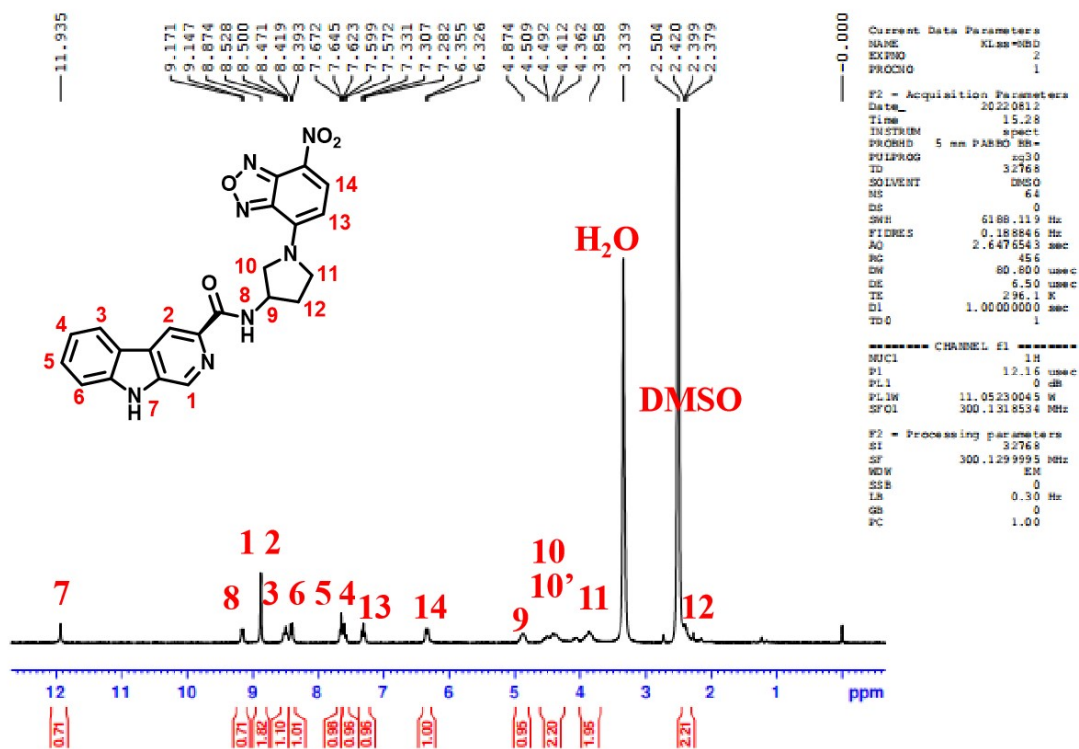

6 Figure S7. The  $^1\text{H}$  NMR of NBD.

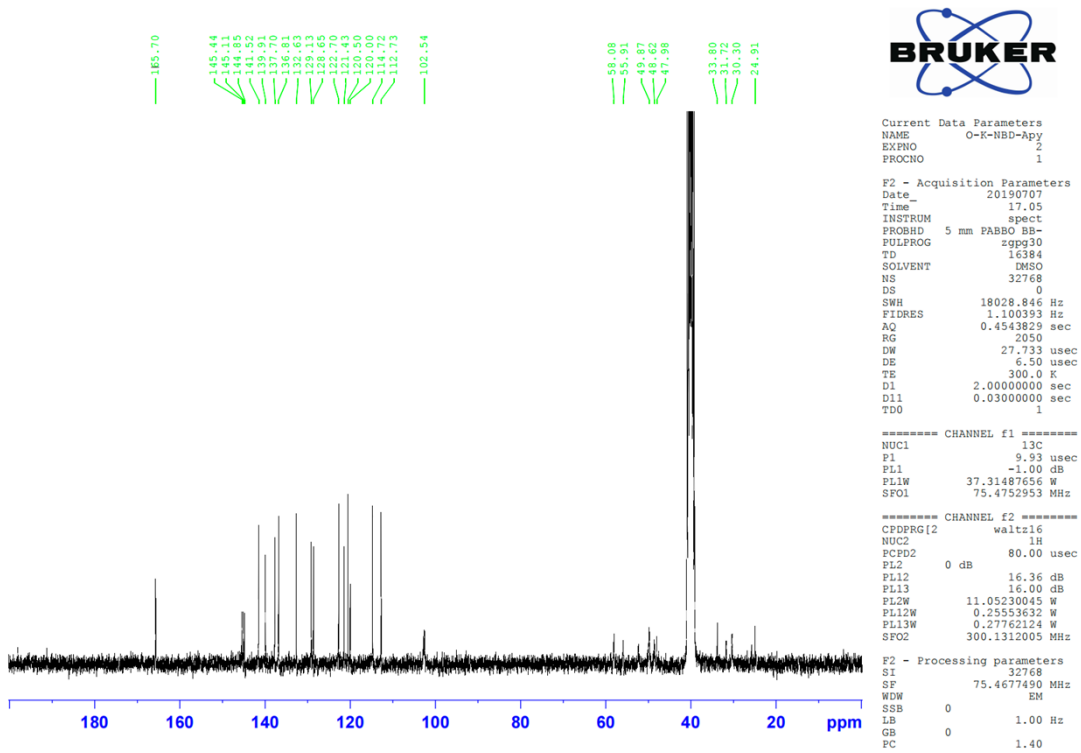

2 Figure S8. The <sup>13</sup>C NMR of NBD.

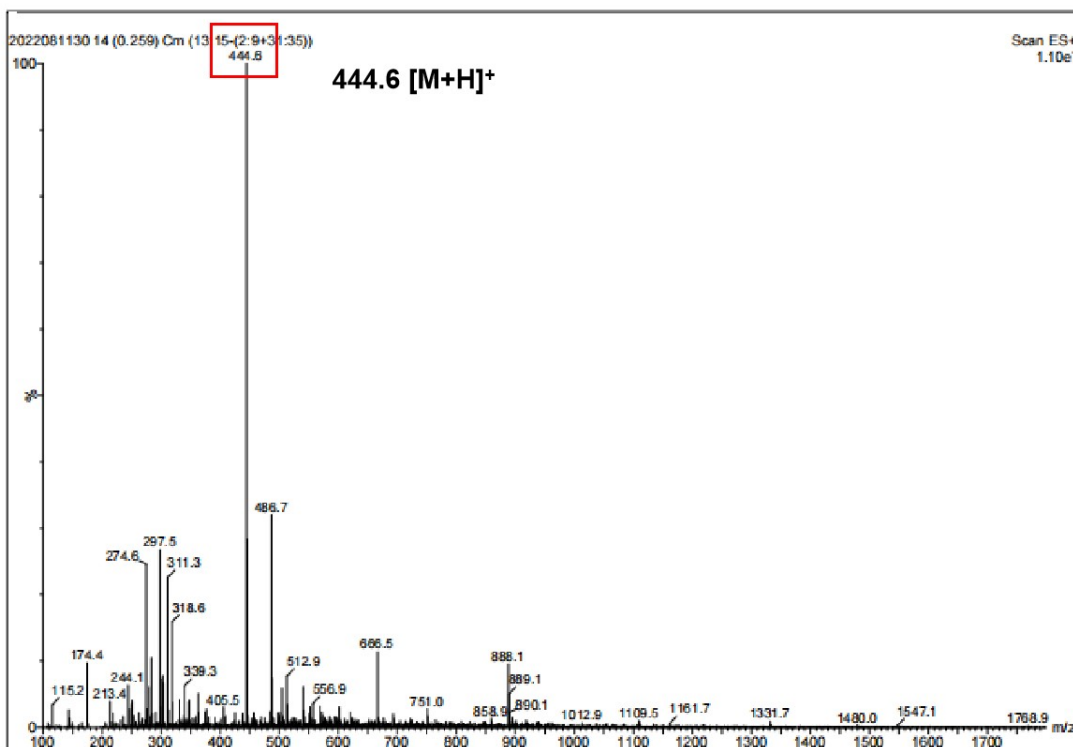

4 Figure S9. The MS spectrum of NBD.

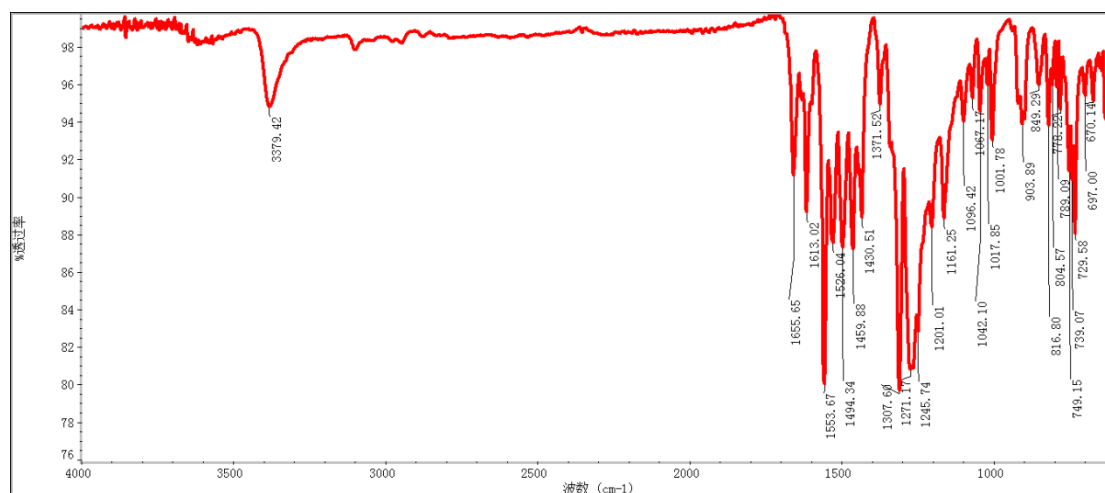

1  
2 Figure S10. The IR spectrum of NBD.

### 3 2. Synthesis of NBD-Ru

4 The synthesis steps of NBD-Ru were similar to that of **3a**. The difference was that the synthetic material  
 5 of NBD-Ru was replaced with 89 mg (0.2 mmol) ligand **6**. The reaction solvent was changed to DMF,  
 6 and the reaction temperature was 80 °C. 22 mg purplish red solid powder (**6a**). FT-MS (m/z): 856.1677  
 7 [M-H]<sup>+</sup>; <sup>1</sup>H-NMR (300 MHz, DMSO-*d*<sub>6</sub>): δ (ppm) = 12.50 (s, 1H), 11.56 (m, 1H), 10.65 (dd, *J* = 33.5  
 8 Hz, 23.5 Hz, 1H), 8.85 (m, 6H), 8.44 (d, *J* = 8.9 Hz, 1H), 8.21 (m, 3H), 8.10 (t, *J* = 7.9 Hz, 2H), 7.94 (s,  
 9 1H), 7.90 (d, *J* = 5.6 Hz, 1H), 7.81 (s, 1H), 7.63 (m, 4H), 7.46 (t, *J* = 6.5 Hz, 2H), 7.40 (m, 2H), 4.83 (m,  
 10 1H), 4.17 (m, 2H), 3.86 (m, 2H), 2.20 (m, 2H); <sup>13</sup>C-NMR (75 MHz, DMSO-*d*<sub>6</sub>): δ (ppm) = 165.71,  
 11 162.76, 160.66, 158.67, 157.11, 153.65, 152.40, 141.52, 139.89, 137.70, 136.81, 134.99, 133.73, 132.64,  
 12 129.12, 128.64, 125.75, 125.68, 123.27, 122.92, 122.68, 121.42, 120.49, 119.99, 114.71, 112.74, 47.98,  
 13 36.23, 33.80, 31.24, 25.79, 24.90; IR: ν<sub>NH</sub>: 3320 cm<sup>-1</sup>, ν<sub>CH2</sub>: 2927 cm<sup>-1</sup>, 2849 cm<sup>-1</sup>, ν<sub>O=C-NH</sub>: 1558 cm<sup>-1</sup>,  
 14 ν<sub>C=C</sub>: 1623 cm<sup>-1</sup>, 1496 cm<sup>-1</sup>, 1460 cm<sup>-1</sup>, ν<sub>C-OH</sub>: 1087 cm<sup>-1</sup>, δ<sub>C-H</sub>: 730 cm<sup>-1</sup>; M.p.: > 300 °C.



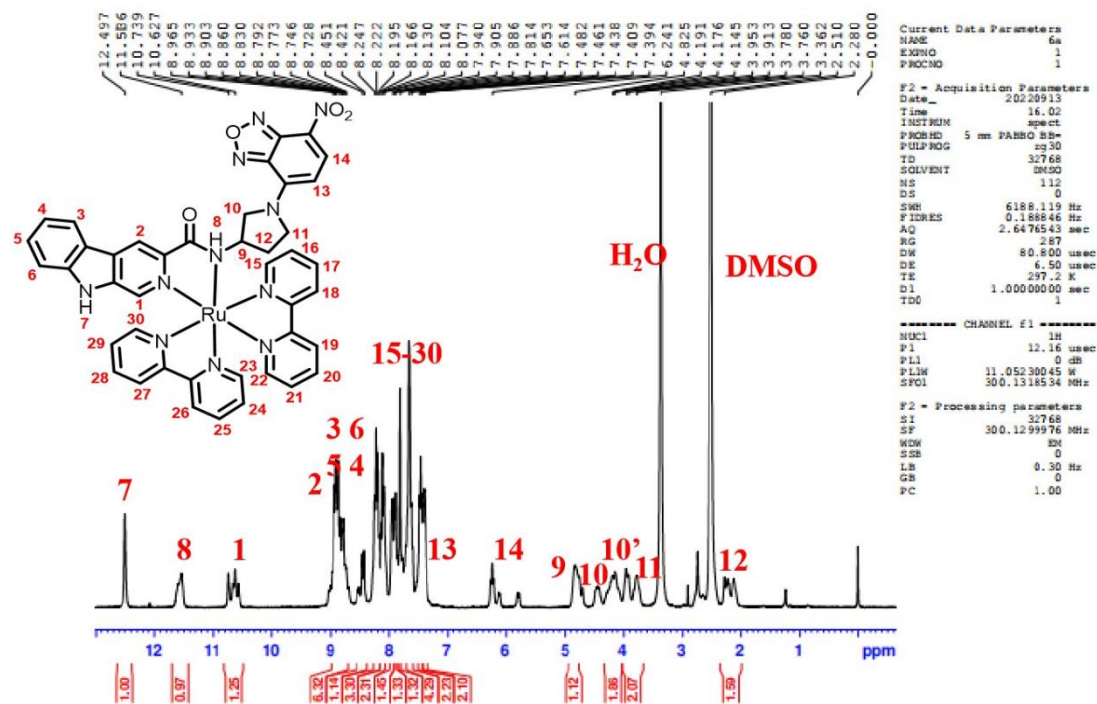

1

2 Figure S11. The  $^1\text{H}$  NMR of NBD-Ru.

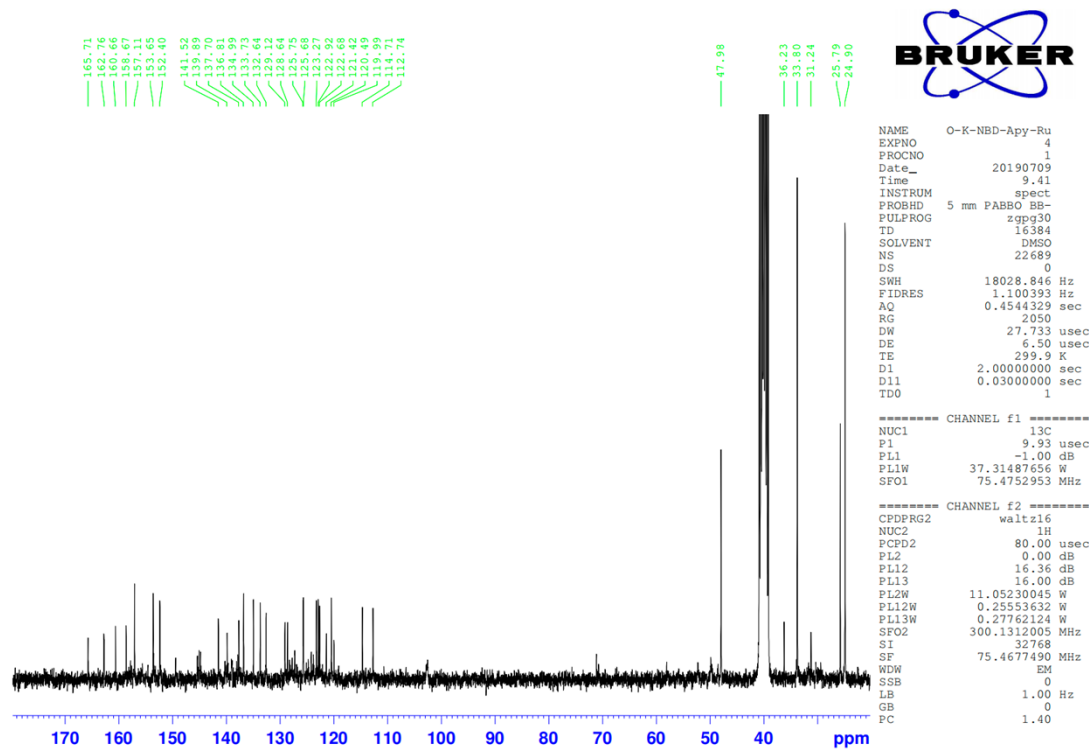

3

4 Figure S12. The  $^{13}\text{C}$  NMR of NBD-Ru.

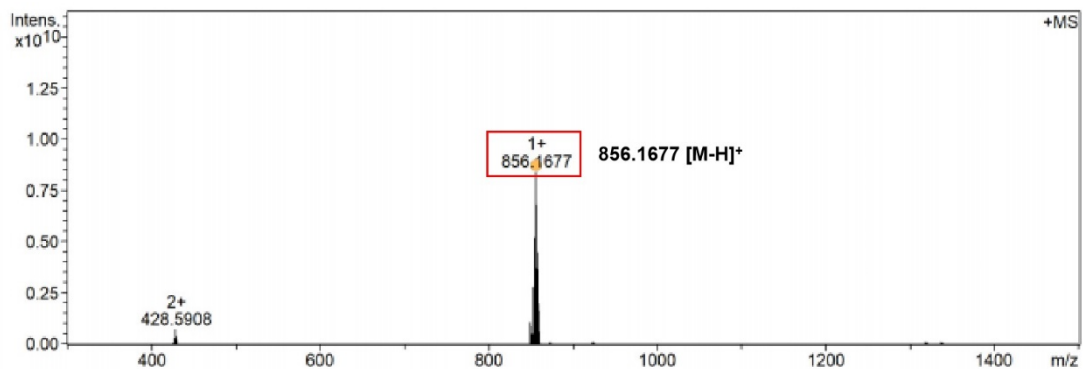

1

2 Figure S13. The FT-MS spectrum of NBD-Ru.

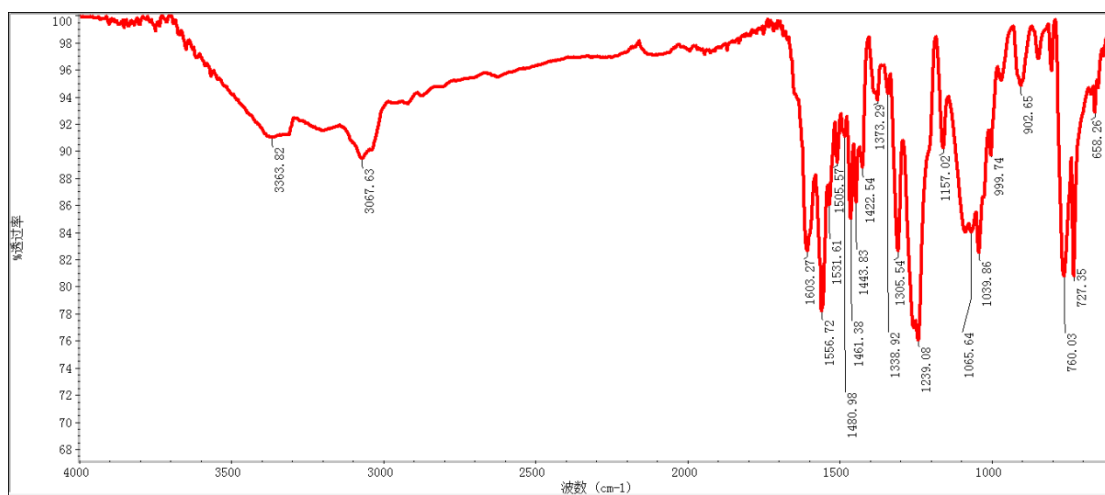

3

4 Figure S14. The IR spectrum of NBD-Ru.

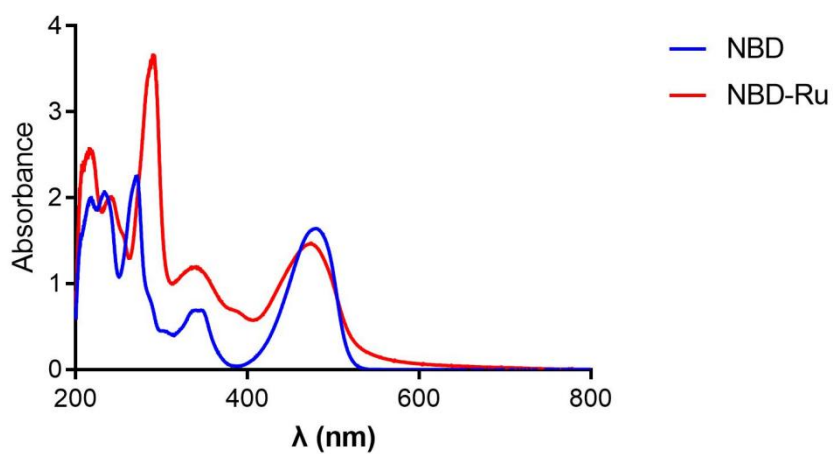

5

6 Figure S15. The UV spectrum of NBD and NBD-Ru in MeOH.

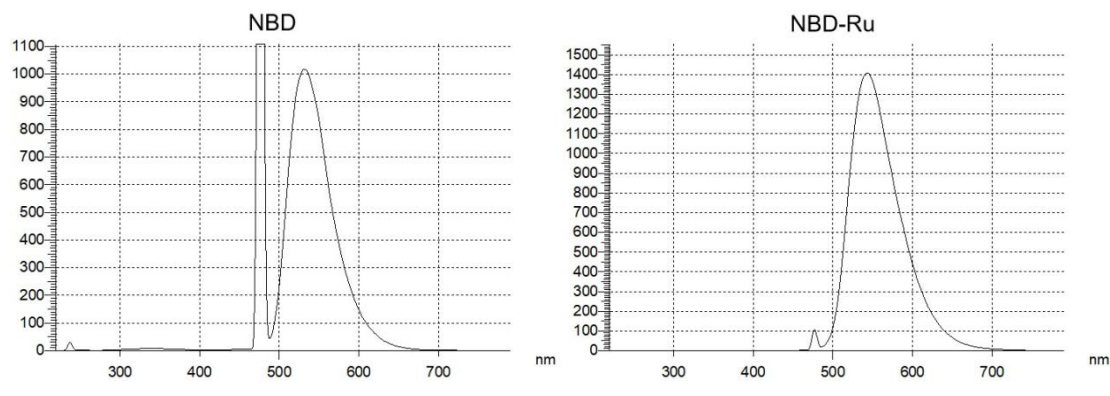

1

2 Figure S16. The fluorescence spectra of **NBD** ( $10^{-4}$  mg/mL in MeOH) and **NBD-Ru** (0.01 mg/mL in  
3 MeOH).

#### 4 **2. Materials**

5 Methanol, Ethanol,  $\text{CH}_2\text{Cl}_2$ ,  $\text{CH}_3\text{OH}$ , NaOH,  $\text{KHSO}_4$ , NaCl,  $\text{Na}_2\text{SO}_4$ , DMF,  $\text{HNO}_3$ , and  $\text{H}_2\text{O}_2$  (N, N-  
6 dimethylformamide) are purchased from Beijing Chemical Reagent Company. *L*-Thr-OBzl  
7 (BeijingBoMaiJie Technology Co, Ltd), RPMI 1640 medium (Gibco, 31800-022), DMEM medium  
8 (Gibco, 12100-046), FBS (Corning, 35-076-CV), Penicillin G Sodium salt (100 U/mL) (Solarbio,  
9 P8420), Streptomycin Sulfate (Solarbio, S8290), MTT ((3-(4,5-dimethylthiazol-2-yl)2,5-diphenyl-  
10 tetrazolium bromide) (Aladdin, 298-93-1), 0.25% trypsin (Hyclone, KGY0012), DOX (Sigma-Aldrich,  
11 CAS: 23214-92-8), DMSO (Hyclone, 57-68-5), PBS (KeyGEN BioTECH, KGB5001), 4%  
12 paraformaldehyde solution (Solarbio, P1110), T25 cell culture flask (Corning, 430639), Human  
13 apotransferrin (Sigma-Aldrich, T2252-100MG), calf thymus DNA ctDNA (Sigma-Aldrich, D8899), 200  
14 mesh TEM copper grid (Electron Microscopy China, AZH200), Cell Cycle and Apoptosis Analysis Kit  
15 (Byotime Biotechnology, C1052), ALT, AST, Urea, Crea assay kits were purchased from Mindray Bio-  
16 Medical Electronics Co., Ltd.

17 S180 (mouse sarcoma S180 cells), A549 (Human Non-small cell lung cancer cell), LLC (mouse Lewis  
18 lung cancer cells), and L02 (normal human embryonic hepatocytes) were purchased from KeyGEN  
19 BioTECH. S180 and A549 cancer cells were maintained in RPMI 1640 medium supplemented with 10%  
20 FBS, LLC, and L02 cells were cultured in DMEM medium supplemented with 10% FBS.

#### 21 **3. Methods**

##### 22 *3.1 MTT*

23 Tumor cells in the logarithmic growth phase were digested with 0.25% trypsin, added to RPMI 1640  
24 medium or DMEM medium supplemented with 10% FBS, plated into 96-well plates ( $3 \times 10^3$  cells/well),

1 and incubated for 8 hours. The cells were treated with compounds (final concentration: 3.125, 6.25, 12.5,  
2 25, 50, and 100  $\mu\text{M}$ ); Cisplatin and NAMI-A were used as standard positive control drugs. Cells in the  
3 control wells also acquired the same volume of medium containing 0.1% DMSO. After 48 h, 25  $\mu\text{L}$  of  
4 MTT in the PBS (5 mg/mL) was added, and the plates were incubated at 37  $^{\circ}\text{C}$  for 4 hours. The  
5 supernatant was discarded, and 150  $\mu\text{L}$  of DMSO was added to each well. The optical density was read  
6 with a Spectra Max M3 microplate reader (BioTek, Winooski, VT, USA) at 490 nm and 570 nm. The  
7 optical density (OD) value of the compounds-treated well was compared with that of the DMSO-treated  
8 well. The proliferation of the cancer cell line was represented by cell viability and  $\text{IC}_{50}$ . Each  
9 measurement was performed in triplicate. Data are presented as mean  $\pm$  SD.

### 10 3.2 Cell cycle

11 The cells were harvested and centrifuged (5 min at 1000 g) and fixed in 2 mL of 70% aqueous ethanol  
12 (v/v). After an incubation of 12 h at 4  $^{\circ}\text{C}$ , cells were centrifuged (10 min at 800 g) and washed twice with  
13 ice-cold PBS. Preparation of PI staining solution according to the kit specification. Cells were  
14 resuspended with 500 $\mu\text{L}$  staining solution containing PI and RNase A. Then the cells were incubated in  
15 darkness for 30 minutes and analyzed by EPICS@XL flow cytometry (BECKMAN COULTER,  
16 Germany). The number of cells analyzed for each sample was more than 10,000, and the experiments  
17 were repeated three times under identical conditions.

### 18 3.3 Protocol of ICP-MS

19 Inductively coupled plasma mass spectrometry (ICP-MS) combines the high-temperature ionization  
20 characteristics of inductively coupled plasma with the low detection limit characteristics of the mass  
21 spectrometer to form a solid multi-element simultaneous determination and low detection limit of trace  
22 elements analysis technology. Agilent 8800 ICP-MS instrument consists of five parts: a high salt sample  
23 injection system, an eight-stage rod collision/reaction cell, a four-stage rod mass filter (Q1, Q2), a plasma  
24 radio frequency emitter, electron multiplication detector. It uses a miniature concentric atomizer and  
25 maintains a double-pass spray chamber at 2  $^{\circ}\text{C}$ . Readings were up to 1 ng/mL, and the sensitivity limit  
26 was 10 pg/mL (95% confidence limit). A range of standard ruthenium solutions (100, 50, 25, 12.5, 6.25,  
27 3.125, and 0 ng/mL) was prepared and placed on the injection rack. Confirm that the washing liquid  
28 (ultra-pure water) is sufficient and that the waste liquid barrel has enough space. Open the ventilation  
29 system and the high-purity Ar gas cylinder with the pressure indicator at about 0.6. In the computer, we  
30 set the theoretical concentration of the standard curve, the internal standard solution  $\text{Rh}^{103}$ , and the

- 1 determination of the element Ru<sup>101</sup>. The system produces a standard curve based on measured actual and
- 2 theoretical concentrations. Afterward, we can place all sample solutions on the rack and program them
- 3 sequentially to determine the ruthenium content.
